# Supplementary material for: Transformation of microbiology data into a standardised data representation using OpenEHR
Source: PubMed Central journal article supplement (PMC8131366; doi:10.1038/s41598-021-89796-y), 2021-05-18
Supplement: 41598_2021_89796_MOESM1_ESM.pdf [file 41598_2021_89796_MOESM1_ESM.pdf]

# Transformation of Microbiology Data into a Standardised Data Representation using OpenEHR

Antje Wulff<sup>1\*#</sup>, Claas Baier<sup>2\*#</sup>, Sarah Ballout<sup>1</sup>, Erik Tute<sup>1</sup>, Kim Katrin Sommer<sup>1</sup>, Martin Kaase<sup>3</sup>, Anneka Sargeant<sup>4</sup>, Cora Drenkhahn<sup>5</sup>, Infection Control Study Group<sup>6</sup>, Dirk Schlüter<sup>2</sup>, Michael Marscholke<sup>1#</sup>, Simone Scheithauer<sup>3#</sup>

<sup>1</sup>*Peter L. Reichertz Institute for Medical Informatics of TU Braunschweig and Hannover Medical School, Carl-Neuberg-Str. 1, 30625 Hannover, Germany*

<sup>2</sup>*Institute for Medical Microbiology and Hospital Epidemiology, Hannover Medical School, Carl-Neuberg-Str. 1, 30625 Hannover, Germany*

<sup>3</sup>*Institute of Infection Control and Infectious Diseases, University Medical Center Göttingen (UMG), Georg-August University Göttingen, Robert-Koch-Str. 40, 37075 Göttingen, Germany.*

<sup>4</sup>*Institute of Medical Informatics, University Medical Center Göttingen (UMG), Georg-August University Göttingen Robert-Koch-Str. 40, 37075 Göttingen, Germany*

<sup>5</sup>*IT Center for Clinical Research (ITCR-L) and Institute of Medical Informatics (IMI), University of Lübeck, Ratzeburger Allee 160, 23538 Lübeck, Germany*

<sup>6</sup>*List of study group members can be found in the main manuscript.*

**#these authors contributed equally to the work**

## **\*Corresponding author at:**

Peter L. Reichertz Institute for Medical Informatics of  
TU Braunschweig and Hannover Medical School,  
Carl-Neuberg-Str. 1, 30625 Hannover, Germany.  
E-Mail address: antje.wulff@plri.de (A.Wulff).  
URL: <http://www.plri.de> (A. Wulff)

## **\*Corresponding author at:**

Institute for Medical Microbiology and Hospital Epidemiology,  
Hannover Medical School,  
Carl-Neuberg-Str. 1, 30625 Hannover, Germany.  
E-Mail address: baier.claas@mh-hannover.de (C. Baier)

# Supplementary Information

|                                                                                                                                                                                         |    |
|-----------------------------------------------------------------------------------------------------------------------------------------------------------------------------------------|----|
| Supplementary Data 1: Exemplary comparison sheet for microbiology reports .....                                                                                                         | 3  |
| Supplementary Data 2: Overview of the value lists defined and mapped onto terminologies* .....                                                                                          | 10 |
| Supplementary Data 3: OpenMibi application .....                                                                                                                                        | 12 |
| Supplementary Data 4: Query parameters for a selected encounter.....                                                                                                                    | 13 |
| Supplementary Data 5: Retrieving Data from the OpenEHR-based Data Repository by AQL.....                                                                                                | 14 |
| Supplementary Data 6: Retrieving Data from the OpenEHR-based Data Repository by openMibi .....                                                                                          | 20 |
| Supplementary Data 7: Retrieving Data from the OpenEHR-based Data Repository by openCQA ....                                                                                            | 23 |
| Supplementary Data 8: Results of the data quality check with pre-defined tasks and an extract of three exemplary result sets with different complexity levels of the openCQA tool ..... | 28 |
| Supplementary Data 9: Automated data quality check: openCQA result (Distribution of microbiology reports) .....                                                                         | 30 |
| Supplementary Data 10: Automated data quality check: openCQA result (Distribution of bacterial counts) .....                                                                            | 31 |

## **Supplementary Data 1: Exemplary comparison sheet for microbiology reports**

**Exemplary detailed comparison for the retrospective review of microbiology reports (evaluation)**

| Microbiology Report for Patient #12345*        |                                                                     |                                                                     |
|------------------------------------------------|---------------------------------------------------------------------|---------------------------------------------------------------------|
| Criteria                                       | OpenEHR Representation                                              | Gold Standard Decision                                              |
| Result report available?                       | Yes <input checked="" type="checkbox"/> No <input type="checkbox"/> | Yes <input checked="" type="checkbox"/> No <input type="checkbox"/> |
| Report state                                   | Preliminary                                                         | Final                                                               |
| Report time                                    | 24.05.2018                                                          | 24.05.2018                                                          |
| Receiving laboratory location                  | Ward 81                                                             | Ward 81                                                             |
| Total number of specimens in the entire report | 1                                                                   | 1                                                                   |
| Specimen #1                                    |                                                                     |                                                                     |
| Specimen type                                  | Urine (permanent catheter)                                          | Urine (permanent catheter)                                          |
| Total number of the pathogens in the specimen  | 2                                                                   | 2                                                                   |
| Culture                                        | Aerobic and anaerobic culture                                       | Aerobic and anaerobic culture                                       |
| Specimen identifier                            | 123456789                                                           | 123456789                                                           |
| Date/time of sampling                          | 22.05.2018 20:54                                                    | 22.05.2018 20:54                                                    |
| Body site                                      | n/a                                                                 | left                                                                |
| Pathogen #1                                    |                                                                     |                                                                     |
| Pathogen name                                  | Escherichia coli                                                    | Escherichia coli                                                    |
| Pathogen quantity                              | 10 <sup>5</sup> /ml                                                 | 10 <sup>5</sup> /ml                                                 |
| Pathogen #2                                    |                                                                     |                                                                     |
| Pathogen name                                  | Enterococcus faecalis                                               | Enterococcus faecalis                                               |
| Pathogen quantity                              | 10 <sup>5</sup> /ml                                                 | 10 <sup>5</sup> /ml                                                 |

| Antibiogram for Pathogen #1            |                                                                                             |                                                                                             |
|----------------------------------------|---------------------------------------------------------------------------------------------|---------------------------------------------------------------------------------------------|
| Which germ relates to the Antibiogram? | Specimen #1 Urine (permanent catheter)<br>Pathogen #1 (Eschrichia coli)                     | Specimen #1 Urine (permanent catheter)<br>Pathogen #1 (Eschrichia coli)                     |
| Antibiotic name                        | Ampicillin                                                                                  | Ampicillin                                                                                  |
| MIC value                              | >= 32                                                                                       | >=32                                                                                        |
| Susceptibility                         | R <input checked="" type="checkbox"/> I <input type="checkbox"/> S <input type="checkbox"/> | R <input checked="" type="checkbox"/> I <input type="checkbox"/> S <input type="checkbox"/> |
| Antibiotic name                        | Ampicillin/Sulbactam                                                                        | Ampicillin-Sulbactam                                                                        |
| MIC value                              | >= 32                                                                                       | >=32                                                                                        |
| Susceptibility                         | R <input checked="" type="checkbox"/> I <input type="checkbox"/> S <input type="checkbox"/> | R <input checked="" type="checkbox"/> I <input type="checkbox"/> S <input type="checkbox"/> |
| Antibiotic name                        | Piperacillin/Sulbactam                                                                      | Piperacillin Sulbactam                                                                      |
| MIC value                              | -                                                                                           | -                                                                                           |
| Susceptibility                         | R <input checked="" type="checkbox"/> I <input type="checkbox"/> S <input type="checkbox"/> | R <input checked="" type="checkbox"/> I <input type="checkbox"/> S <input type="checkbox"/> |
| Antibiotic name                        | Piperacillin/Tazobactam                                                                     | Piperacillin-Tazobactam                                                                     |
| MIC value                              | >= 128                                                                                      | >=128                                                                                       |
| Susceptibility                         | R <input checked="" type="checkbox"/> I <input type="checkbox"/> S <input type="checkbox"/> | R <input checked="" type="checkbox"/> I <input type="checkbox"/> S <input type="checkbox"/> |
| Antibiotic name                        | Cefuroxim                                                                                   | Cefuroxim                                                                                   |
| MIC value                              | = 16                                                                                        | 16                                                                                          |
| Susceptibility                         | R <input checked="" type="checkbox"/> I <input type="checkbox"/> S <input type="checkbox"/> | R <input checked="" type="checkbox"/> I <input type="checkbox"/> S <input type="checkbox"/> |
| Antibiotic name                        | Cefuroxime-Axetil                                                                           | Cefuroxime-Axetil                                                                           |
| MIC value                              | 16                                                                                          | 16                                                                                          |
| Susceptibility                         | R <input checked="" type="checkbox"/> I <input type="checkbox"/> S <input type="checkbox"/> | R <input checked="" type="checkbox"/> I <input type="checkbox"/> S <input type="checkbox"/> |
| Antibiotic name                        | Cefpodoxim                                                                                  | Cefpodoxim                                                                                  |
| MIC value                              | = 2                                                                                         | 2                                                                                           |
| Susceptibility                         | R <input checked="" type="checkbox"/> I <input type="checkbox"/> S <input type="checkbox"/> | R <input checked="" type="checkbox"/> I <input type="checkbox"/> S <input type="checkbox"/> |

|                 |                                                                                             |                                                                                             |
|-----------------|---------------------------------------------------------------------------------------------|---------------------------------------------------------------------------------------------|
| Antibiotic name | Ceftriaxon                                                                                  | Ceftriaxon                                                                                  |
| MIC value       | -                                                                                           | -                                                                                           |
| Susceptibility  | R <input type="checkbox"/> I <input type="checkbox"/> S <input checked="" type="checkbox"/> | R <input type="checkbox"/> I <input type="checkbox"/> S <input checked="" type="checkbox"/> |
| Antibiotic name | Cefotaxim                                                                                   | Cefotaxim                                                                                   |
| MIC value       | <= 1                                                                                        | <=1                                                                                         |
| Susceptibility  | R <input type="checkbox"/> I <input type="checkbox"/> S <input checked="" type="checkbox"/> | R <input type="checkbox"/> I <input type="checkbox"/> S <input checked="" type="checkbox"/> |
| Antibiotic name | Ceftazidim                                                                                  | Ceftazidim                                                                                  |
| MIC value       | <= 1                                                                                        | <=1                                                                                         |
| Susceptibility  | R <input type="checkbox"/> I <input type="checkbox"/> S <input checked="" type="checkbox"/> | R <input type="checkbox"/> I <input type="checkbox"/> S <input checked="" type="checkbox"/> |
| Antibiotic name | Gentamicin                                                                                  | Gentamicin                                                                                  |
| MIC value       | <= 1                                                                                        | =1                                                                                          |
| Susceptibility  | R <input type="checkbox"/> I <input type="checkbox"/> S <input checked="" type="checkbox"/> | R <input type="checkbox"/> I <input type="checkbox"/> S <input checked="" type="checkbox"/> |
| Antibiotic name | Tobramycin                                                                                  | Tobramycin                                                                                  |
| MIC value       | -                                                                                           | -                                                                                           |
| Susceptibility  | R <input type="checkbox"/> I <input type="checkbox"/> S <input checked="" type="checkbox"/> | R <input type="checkbox"/> I <input type="checkbox"/> S <input checked="" type="checkbox"/> |
| Antibiotic name | Fosfomycin                                                                                  | Fosfomycin                                                                                  |
| MIC value       | <= 16                                                                                       | <=16                                                                                        |
| Susceptibility  | R <input type="checkbox"/> I <input type="checkbox"/> S <input checked="" type="checkbox"/> | R <input type="checkbox"/> I <input type="checkbox"/> S <input checked="" type="checkbox"/> |
| Antibiotic name | Nitrofurantoin                                                                              | Nitrofurantoin                                                                              |
| MIC value       | <= 16                                                                                       | <=16                                                                                        |
| Susceptibility  | R <input type="checkbox"/> I <input type="checkbox"/> S <input checked="" type="checkbox"/> | R <input type="checkbox"/> I <input type="checkbox"/> S <input checked="" type="checkbox"/> |
| Antibiotic name | Levofloxacin                                                                                | Levofloxacin                                                                                |
| MIC value       | <= 0.12                                                                                     | <=0.12                                                                                      |
| Susceptibility  | R <input type="checkbox"/> I <input type="checkbox"/> S <input checked="" type="checkbox"/> | R <input type="checkbox"/> I <input type="checkbox"/> S <input checked="" type="checkbox"/> |
| Antibiotic name | Ciprofloxacin                                                                               | Ciprofloxacin                                                                               |
| MIC value       | <= 0.25                                                                                     | <=0.25                                                                                      |

|                                        |                                                                                             |                                                                                             |
|----------------------------------------|---------------------------------------------------------------------------------------------|---------------------------------------------------------------------------------------------|
| Susceptibility                         | R <input type="checkbox"/> I <input type="checkbox"/> S <input checked="" type="checkbox"/> | R <input type="checkbox"/> I <input type="checkbox"/> S <input checked="" type="checkbox"/> |
| Antibiotic name                        | Moxifloxacin                                                                                | Moxifloxacin                                                                                |
| MIC value                              | -                                                                                           | -                                                                                           |
| Susceptibility                         | R <input type="checkbox"/> I <input type="checkbox"/> S <input checked="" type="checkbox"/> | R <input type="checkbox"/> I <input type="checkbox"/> S <input checked="" type="checkbox"/> |
| Antibiotic name                        | Meropenem                                                                                   | Meropenem                                                                                   |
| MIC value                              | <= 0.25                                                                                     | <=0.25                                                                                      |
| Susceptibility                         | R <input type="checkbox"/> I <input type="checkbox"/> S <input checked="" type="checkbox"/> | R <input type="checkbox"/> I <input type="checkbox"/> S <input checked="" type="checkbox"/> |
| Antibiotic name                        | Sulfamethoxazol/Trimethoprim (Cotrimoxazol)                                                 | Cotrimoxazol                                                                                |
| MIC value                              | >= 320                                                                                      | >=320                                                                                       |
| Susceptibility                         | R <input checked="" type="checkbox"/> I <input type="checkbox"/> S <input type="checkbox"/> | R <input checked="" type="checkbox"/> I <input type="checkbox"/> S <input type="checkbox"/> |
| <b>Antibiogram 2</b>                   |                                                                                             |                                                                                             |
| Which germ relates to the Antibiogram? | Specimen #1 Urine (permanent catheter)<br>Pathogen #2 (Enterococcus faecalis)               | Specimen #1 Urine (permanent catheter)<br>Pathogen #2 (Enterococcus faecalis)               |
| Antibiotic name                        | Ampicillin                                                                                  | Ampicillin                                                                                  |
| MIC value                              | <= 2                                                                                        | <=2                                                                                         |
| Susceptibility                         | R <input type="checkbox"/> I <input type="checkbox"/> S <input checked="" type="checkbox"/> | R <input type="checkbox"/> I <input type="checkbox"/> S <input checked="" type="checkbox"/> |
| Antibiotic name                        | Ampicillin/Sulbactam                                                                        | Ampicillin-Sulbactam                                                                        |
| MIC value                              | <= 2                                                                                        | <=2                                                                                         |
| Susceptibility                         | R <input type="checkbox"/> I <input type="checkbox"/> S <input checked="" type="checkbox"/> | R <input type="checkbox"/> I <input type="checkbox"/> S <input checked="" type="checkbox"/> |
| Antibiotic name                        | Gentamicin High-Level                                                                       | Gentamicin (Hochresistenz)                                                                  |
| MIC value                              | -                                                                                           | -                                                                                           |
| Susceptibility                         | R <input type="checkbox"/> I <input type="checkbox"/> S <input checked="" type="checkbox"/> | R <input type="checkbox"/> I <input type="checkbox"/> S <input type="checkbox"/>            |
| Antibiotic name                        | Doxycyclin                                                                                  | Doxycycline                                                                                 |
| MIC value                              | -                                                                                           | -                                                                                           |
| Susceptibility                         | R <input checked="" type="checkbox"/> I <input type="checkbox"/> S <input type="checkbox"/> | R <input checked="" type="checkbox"/> I <input type="checkbox"/> S <input type="checkbox"/> |
| Antibiotic name                        | Tetracyclin                                                                                 | Tetracyclin                                                                                 |

|                        |                                                                                             |                                                                                             |
|------------------------|---------------------------------------------------------------------------------------------|---------------------------------------------------------------------------------------------|
| <b>MIC value</b>       | >= 16                                                                                       | >=16                                                                                        |
| <b>Susceptibility</b>  | R <input checked="" type="checkbox"/> I <input type="checkbox"/> S <input type="checkbox"/> | R <input checked="" type="checkbox"/> I <input type="checkbox"/> S <input type="checkbox"/> |
| <b>Antibiotic name</b> | Tigecyclin                                                                                  | Tigecyclin                                                                                  |
| <b>MIC value</b>       | <=0.12                                                                                      | <0.12                                                                                       |
| <b>Susceptibility</b>  | R <input type="checkbox"/> I <input type="checkbox"/> S <input checked="" type="checkbox"/> | R <input type="checkbox"/> I <input type="checkbox"/> S <input checked="" type="checkbox"/> |
| <b>Antibiotic name</b> | Nitrofurantoin                                                                              | Nitrofurantoin                                                                              |
| <b>MIC value</b>       | <= 16                                                                                       | <=16                                                                                        |
| <b>Susceptibility</b>  | R <input type="checkbox"/> I <input type="checkbox"/> S <input checked="" type="checkbox"/> | R <input type="checkbox"/> I <input type="checkbox"/> S <input checked="" type="checkbox"/> |
| <b>Antibiotic name</b> | Levofloxacin                                                                                | Levofloxacin                                                                                |
| <b>MIC value</b>       | = 1                                                                                         | 1                                                                                           |
| <b>Susceptibility</b>  | R <input type="checkbox"/> I <input type="checkbox"/> S <input checked="" type="checkbox"/> | R <input type="checkbox"/> I <input type="checkbox"/> S <input checked="" type="checkbox"/> |
| <b>Antibiotic name</b> | Imipenem                                                                                    | Imipenem                                                                                    |
| <b>MIC value</b>       | <= 1                                                                                        | <=1                                                                                         |
| <b>Susceptibility</b>  | R <input type="checkbox"/> I <input type="checkbox"/> S <input checked="" type="checkbox"/> | R <input type="checkbox"/> I <input type="checkbox"/> S <input checked="" type="checkbox"/> |
| <b>Antibiotic name</b> | Vancomycin                                                                                  | Vancomycin                                                                                  |
| <b>MIC value</b>       | = 2                                                                                         | 2                                                                                           |
| <b>Susceptibility</b>  | R <input type="checkbox"/> I <input type="checkbox"/> S <input checked="" type="checkbox"/> | R <input type="checkbox"/> I <input type="checkbox"/> S <input checked="" type="checkbox"/> |
| <b>Antibiotic name</b> | Teicoplanin                                                                                 | Teicoplanin                                                                                 |
| <b>MIC value</b>       | <= 0.5                                                                                      | <0.5                                                                                        |
| <b>Susceptibility</b>  | R <input type="checkbox"/> I <input type="checkbox"/> S <input checked="" type="checkbox"/> | R <input type="checkbox"/> I <input type="checkbox"/> S <input checked="" type="checkbox"/> |
| <b>Antibiotic name</b> | Sulfamethoxazol/Trimethoprim (Cotrimoxazol)                                                 | Cotrimoxazol                                                                                |
| <b>MIC value</b>       | <= 10                                                                                       | <=10                                                                                        |
| <b>Susceptibility</b>  | R <input type="checkbox"/> I <input checked="" type="checkbox"/> S <input type="checkbox"/> | R <input type="checkbox"/> I <input checked="" type="checkbox"/> S <input type="checkbox"/> |
| <b>Antibiotic name</b> | Quinupristin/Dalfopristin                                                                   | Quinu-/Dalfopristin                                                                         |
| <b>MIC value</b>       | = 8                                                                                         | 8                                                                                           |
| <b>Susceptibility</b>  | R <input checked="" type="checkbox"/> I <input type="checkbox"/> S <input type="checkbox"/> | R <input checked="" type="checkbox"/> I <input type="checkbox"/> S <input type="checkbox"/> |



|                        |                                                                                             |                                                                                             |
|------------------------|---------------------------------------------------------------------------------------------|---------------------------------------------------------------------------------------------|
| <b>Antibiotic name</b> | Linezolid                                                                                   | Linezolid                                                                                   |
| <b>MIC value</b>       | = 2                                                                                         | 2                                                                                           |
| <b>Susceptibility</b>  | R <input type="checkbox"/> I <input type="checkbox"/> S <input checked="" type="checkbox"/> | R <input type="checkbox"/> I <input type="checkbox"/> S <input checked="" type="checkbox"/> |

Table 1: Exemplary comparison sheet for microbiology reports

## Supplementary Data 2: Overview of the value lists defined and mapped onto terminologies\*

| Archetype                           | Item                                 | Consented value list                                                                                                                                | Terminology                                |
|-------------------------------------|--------------------------------------|-----------------------------------------------------------------------------------------------------------------------------------------------------|--------------------------------------------|
| Result report                       | State                                | Preliminary report, final report                                                                                                                    | Local terms                                |
| Laboratory test                     | Test name                            | Microbiology examination<br>[fixed value]                                                                                                           | Local terms                                |
| Specimen                            | Specimen type                        | Blood culture aerobic, blood culture anaerobic, blood culture, swab<br>+ <i>free text for additional values</i>                                     | SNOMED CT                                  |
| Anatomical location                 | Body site name                       | Anus, nose, nasopharyngeal, throat, rectum, arterial, venous<br>+ <i>free text for additional values</i>                                            | SNOMED CT                                  |
| Laboratory test analyte             | Analyte                              | Presence, Absence                                                                                                                                   | Local terms                                |
| Laboratory test analyte             | Analyte result (identified pathogen) | List available in CKM:<br><a href="https://ckm.highmed.org/ckm/document?cid=1246.159.96">https://ckm.highmed.org/ckm/document?cid=1246.159.96</a>   | SNOMED CT                                  |
| Pathogen details                    | Frequency                            | List available in CKM:<br><a href="https://ckm.highmed.org/ckm/document?cid=1246.159.101">https://ckm.highmed.org/ckm/document?cid=1246.159.101</a> | SNOMED CT                                  |
| Pathogen details – slot antibiogram | Antibiotic name                      | List available in CKM:<br><a href="https://ckm.highmed.org/ckm/document?cid=1246.159.98">https://ckm.highmed.org/ckm/document?cid=1246.159.98</a>   | LOINC                                      |
| Pathogen details – slot antibiogram | Susceptibility                       | Resistant, Susceptible (standard dosing regimen), Susceptible (increased exposure)                                                                  | e.g. EUCAST                                |
| Pathogen details                    | MDRO class                           | e.g. MRSA, VRE                                                                                                                                      | Local terms, based on national definitions |

|                        |               |                                                                                                                                                                                        |       |
|------------------------|---------------|----------------------------------------------------------------------------------------------------------------------------------------------------------------------------------------|-------|
| <b>Laboratory test</b> | Order request | List available in CKM:<br><a href="https://ckm.highmed.org/ckm/document?cid=1246.159.97">https://ckm.highmed.org/ckm/document?cid=1246.159.97</a><br>+ free text for additional values | LOINC |
|------------------------|---------------|----------------------------------------------------------------------------------------------------------------------------------------------------------------------------------------|-------|

Table 2: Overview of archetypes used for representing microbiology data

\*To outsource the complexity of terminology interaction from within applications, the HiGHmed consortium decided to license a terminology server: *Ontoserver* by CSIRO (doi: 10.1186/s13326-018-0191-z)

# Supplementary Data 3: OpenMibi application


openMibi
Logout

Patient search

Search for:  EHR-Id  Patient-Id

123-abc-456-def

Select

**Encounter 123456 : 06/03/2017 - 13/03/2017**



- Encounter
- Patient location: ward NAP
- ▼ Patient location: RAD
- ▼ Patient location: URO consul
- ▼ Patient location: central OP-02
- ▼ Patient location: RAD
- ▼ Patient location: URO consul
- ▼ Patient location: ward 27
- ▼ Patient location: ward 27
- ▼ Patient location: URO consul
- ▼ Patient location: trauma surgery
- Patient location: ward 73
- Patient location: ward 73
- ▼ Patient location: RAD
- ▼ Patient location: PMR physiotherapy

Case identifiers with microbiological findings

123456

Order by:  Date/time of report  Order request

### Microbiology report

Case identifier: 123456

Report state: Final

Date/time: 11/03/2017

Order identifier: 111222

Recipient location: 73

Order request: aerobic/anaerobe culture

Case identifier: 123456

Report state: Final

Date/time: 13/03/2017

Order identifier: 222333

Recipient location: 73

Order request: aerobic/anaerobe culture

Case identifier: 123456

Report state: Final

Date/time: 07/03/2017

Order identifier: 333444

Recipient location: 27

Order request: MRSA

### Specimens

Specimen type: Blood culture aerobic

Specimen identifier: 999999999999

Date/time collected: 11/03/2017, 9:45 pm

Date/time received: 12/03/2017, 1:54 pm

Anatomical location: Other

MLAB name: Blood culture

Specimen type: Blood culture aerobic

Specimen identifier: 888888888888

Date/time collected: 11/03/2017, 9:45 pm

Date/time received: 12/03/2017, 1:54 pm

Anatomical location: Other

MLAB name: Blood culture

### Microorganisms

Name: *Klebsiella pneumoniae*

Result: Evidence

Date/time of result: 14/03/2017

Germ number: 1

Name: *Klebsiella pneumoniae*

Result: Evidence

Date/time of result: 14/03/2017

Germ number: 2

### Antibiogram

Date/time generated: 15/03/2017

| Antibiotic name                             | Resistance | MIC  | MLAB name               |
|---------------------------------------------|------------|------|-------------------------|
| Ampicillin                                  | R          | >32  | Ampicillin              |
| Ampicillin/Sulbactam                        | R          | >32  | Ampicillin-Sulbactam    |
| Aztreonam                                   | R          | >16  | Aztreonam               |
| Cefotaxim                                   | R          | >8   | Cefotaxim               |
| Ceftazidim                                  | R          | >32  | Ceftazidim              |
| Cefuroxim                                   | R          | >16  | Cefuroxim               |
| Ciprofloxacin                               | R          | >4   | Ciprofloxacin           |
| Colistin                                    | R          | =4   | Colistin                |
| Ertapenem                                   | R          | =4   | Ertapenem               |
| Gentamicin                                  | R          | =8   | Gentamicin              |
| Meropenem                                   | R          | >16  | Meropenem               |
| Moxifloxacin                                | R          | =2   | Moxifloxacin            |
| Piperacillin/Tazobactam                     | R          | >32  | Piperacillin-Tazobactam |
| Sulfamethoxazol/Trimethoprim (Cotrimoxazol) | R          | >16  | Cotrimoxazol            |
| Tetracyclin                                 | R          | =8   | Tetracyclin             |
| Tigecyclin                                  | S          | =0.5 | Tigecyclin              |
| Tobramycin                                  | R          | >8   | Tobramycin              |

MeDIC // Medizinisches Datenintegrationszentrum Hannover

© 2020 Copyright: MeDIC Hannover

Figure 1: Full view of the openEHR-based application for microbiology data (openMibi)

12

**Supplementary Data 4: Query parameters for a selected encounter**

**Query parameters for a selected encounter (openMibi)**

| Number | Section             | Items displayed                                                                                  | AQL parameter                                     |
|--------|---------------------|--------------------------------------------------------------------------------------------------|---------------------------------------------------|
| (1)    | Microbiology Report | Encounter identifier, status, date/time, order-ID, recipient location, order request             | EHR-ID<br>Encounter-ID                            |
| (2)    | Specimens           | Specimen type, specimen identifier, date/time collected, date/time received, anatomical location | EHR-ID<br>Report-ID                               |
| (3)    | Microorganism       | Name, result, date/time of result, germ number                                                   | EHR-ID<br>Report-ID<br>Specimen-ID                |
| (4)    | Antibiograms        | Date/time generated, antibiotic name, resistance, minimum inhibitory concentration               | EHR-ID<br>Report-ID<br>Specimen-ID<br>Pathogen-ID |

*AQL, Archetype Query Language*

Table 3: Query parameters for a selected encounter in the openMibi application

## Supplementary Data 5: Retrieving Data from the OpenEHR-based Data Repository by AQL

### Example:

**Find all patients with a blood culture sample carrying more than one species**

Based on the standardized data repository many different data queries can be tailored and specified by the user. Therefore, the archetype query language (AQL)<sup>1</sup> can be used. AQL is a query language that acts directly upon the openEHR-based data model (called *archetype*) and not the database level meaning that each AQL query is executable in any openEHR based data repository as long as the same archetypes are used.

Step 0: Check availability of data in openEHR based format and access rights and credentials

Data must be integrated into and available from an openEHR based data repository (e. g. *Better Platform* by Better d.o.o. in Ljubljana<sup>2</sup>, SL or *Ehrbase* (open source), commercial support by Vitasystems in Mannheim, DE<sup>3</sup>) at each institution, according to the consented and standardized data models. The user who would like to access data needs to gain access rights, credentials and connection parameters (e.g. the link to the query editor of the chosen repository or the link to a specific REST API).

Step 1: Identification of the openEHR template representing the data required

In our case, we are looking for blood culture samples and microbiology results, so we need to search data in the data model *microbiology report*<sup>4</sup>.

---

<sup>1</sup> <http://www.openehr.org/releases/QUERY/latest/docs/AQL/AQL.html>

<sup>2</sup> <https://platform.better.care/>

<sup>3</sup> <https://ehrbase.org/>

<sup>4</sup> <http://ckm.highmed.org/ckm/templates/1246.169.69>

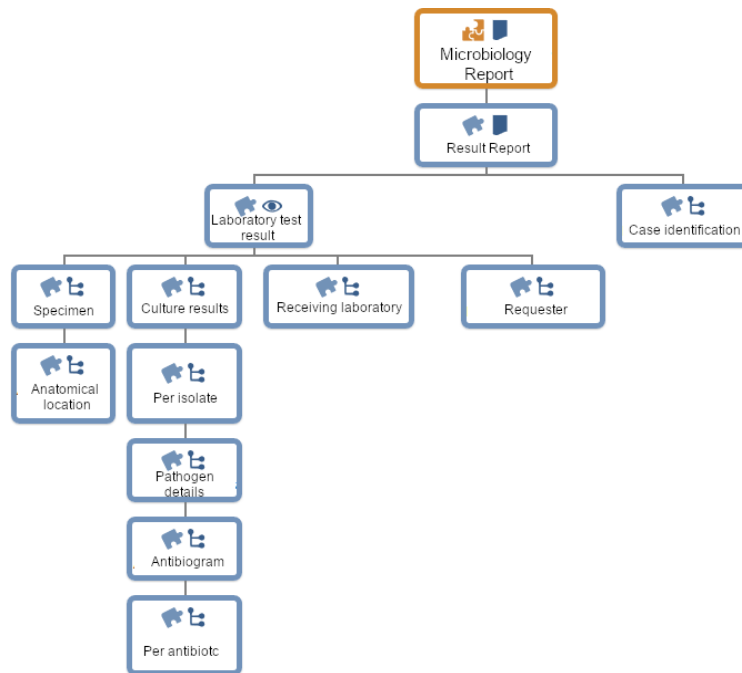

Figure 2: Overview of the hierarchy structure of the openEHR template for microbiology results

### Step 2: Identification of the data items needed

According to our example, we need the (1) patient identifiers as the result of our query. With these identifiers, we can further look for more details of each patient (which is not included in this example).

However, we would like to find patients with specific microbiology results.

Consequently, we also need data items referring to (2) an existing blood culture sample (data item: *specimen type* of the archetype specimen<sup>5</sup>), and (3) a culture result (data item: *analyte result* [identified pathogen] of the archetype laboratory analyte result<sup>6</sup>). To find out whether the blood culture sample delivers one or more results, we are also interested in the (4) *specimen identifier* (data item: laboratory specimen identifier of the archetype specimen).

### Step 3: Reproduce template hierarchy in query

All relevant data items are included in the above-mentioned template. For the query, we need to reproduce the template hierarchy (Figure 2) in the query as needed for the search request.

To look for microbiology reports in the repository independent of a specific patient, we need to specify in the query that a so called 'composition' with the name

<sup>5</sup> <https://ckm.highmed.org/ckm/archetypes/1246.145.748>

<sup>6</sup> <https://ckm.highmed.org/ckm/archetypes/1246.145.396>

'microbiology report' must be available in any electronic health record (*contains composition microbiology report*).

Since we are searching for samples with microorganisms found, we need to specify that the report contains a sample (*contains cluster specimen*) and a finding (*contains cluster culture result*). As you can see in Figure 2, the specimen and the culture results are nested into another element called 'laboratory test result' which is why we need to include this above those two 'contains' statements as follows:

```
[...]
EHR e
CONTAINS COMPOSITION c[openEHR-EHR-COMPOSITION.report-
result.v1,'Microbiology report']
  CONTAINS (
    CLUSTER d[openEHR-EHR-CLUSTER.specimen.v1]
    AND
    OBSERVATION o[openEHR-EHR-OBSERVATION.laboratory_test_result.v1]
      CONTAINS CLUSTER w[openEHR-EHR-CLUSTER.laboratory_test_analyte.v1]
  )
```

#### Step 4: Find the correct technical path pointing to the data items

A patient can be identified by the so-called *ehr-id* representing an unique identifier of every patient. The corresponding so-called path is *e/ehr\_id/value*.

Each archetype item is identified by a unique path that can be accessed to retrieve data from this archetype. The corresponding paths can be looked up for instance in the CKM (German)<sup>7</sup>. Clicking on 'Show Paths' visualizes an unique path to the specific data item.

The required paths for this search request are:

- (1) e/ehr\_id/value as patient\_id
- (2) d/items[at0001]/value/id as specimen\_id
- (3) d/items[at0029]/value/value as specimen\_type
- (4) w/items[at0001]/value/value as pathogen\_identified

The first letter points to the corresponding archetype carrying this data item (see above, e.g. specimen comes with the variable 'd' which is why the path to *specimen\_id* starts with *d/*).

---

<sup>7</sup> <http://ckm.highmed.org/ckm/templates/1246.169.69>



#### Step 4: Create SELECT FROM statement

It is now possible to create the query using the SELECT FROM statement as known from other query languages.

'DISTINCT' can be used to assure that now duplicates are retrieved.

```
SELECT DISTINCT
e/ehr_id/value as patient_id,
d/items[at0001]/value/id as specimen_id,
d/items[at0029]/value/value as specimen_type,
w/items[at0001]/value/value as pathogen_identified
FROM EHR e
CONTAINS COMPOSITION c[openEHR-EHR-COMPOSITION.report-
result.v1,'Microbiology report']
    CONTAINS (
        CLUSTER d[openEHR-EHR-CLUSTER.specimen.v1]
        AND
        OBSERVATION o[openEHR-EHR-OBSERVATION.laboratory_test_result.v1]
        CONTAINS CLUSTER w[openEHR-EHR-
CLUSTER.laboratory_test_analyte.v1]
    )
```

#### Step 5: Limit results

We are only interested in blood culture samples and in microbiology results delivering one or more microorganisms found which is why we can add a 'WHERE' statement in which such limiting requirements can be defined as follows:

```
WHERE
exists w/items[at0001]/value/value and
d/items[at0029]/value matches {'blood culture aerobic', 'blood culture
anaerobic', 'blood culture'}
```

#### Step 6: Sort results

The results can be ordered by the specimen id and the specimen type to identify whether two or more results were found in a specific specimen.

```
ORDER BY
order by d/items[at0001]/value/id, d/items[at0029]/value/value asc
```

#### Step 7: Finalize query and send to repository

The final query for instance can look like this:

```

SELECT DISTINCT
e/ehr_id/value as patient_id,
d/items[at0001]/value/id as specimen_id,
d/items[at0029]/value/value as specimen_type,
w/items[at0001]/value/value as pathogen_identified
FROM EHR e
CONTAINS COMPOSITION c[openEHR-EHR-COMPOSITION.report-
result.v1,'Microbiology report']
    CONTAINS (
        CLUSTER d[openEHR-EHR-CLUSTER.specimen.v1]
        AND
        OBSERVATION o[openEHR-EHR-OBSERVATION.laboratory_test_result.v1]
        CONTAINS CLUSTER w[openEHR-EHR-
CLUSTER.laboratory_test_analyte.v1]
    )
WHERE
exists w/items[at0001]/value/value and
d/items[at0029]/value matches {'blood culture aerobic', 'blood culture
anaerobic', 'blood culture'}
ORDER BY
order by d/items[at0001]/value/id, d/items[at0029]/value/value asc

```

There are different ways to send this query to the data repository according to the repository chosen and the connection approaches (see step 0). Since these are technical issues, we abstain from presenting these.

A result might look like this (in a table format):

| patient_id | specimen_id | specimen_type           | pathogen_identified        |
|------------|-------------|-------------------------|----------------------------|
| 12345      | 00001       | blood culture aerobic   | Staphylococcus epidermidis |
| 12345      | 00002       | blood culture anaerobic | Staphylococcus epidermidis |
| 678910     | 00003       | blood culture aerobic   | Micrococcus luteus         |
| 111213     | 00004       | blood culture aerobic   | Staphylococcus epidermidis |
| 111213     | 00005       | blood culture anaerobic | Staphylococcus epidermidis |
| 141516     | 00006       | blood culture aerobic   | Staphylococcus capitis     |
| 141516     | 00007       | blood culture anaerobic | Staphylococcus capitis     |
| 171819     | 00008       | blood culture aerobic   | Streptococcus anginosus    |
| 171819     | 00008       | blood culture aerobic   | Pediococcus pentosaceus    |
| 171819     | 00009       | blood culture anaerobic | Staphylococcus epidermidis |

Table 4: AQL result (table format)

By looking at these structured results, it is easy to identify all patients with a blood culture sample carrying more than one species. However, there are a lot more possibilities to define queries, e.g. you can also work with so-called 'GROUP BY' and 'COUNT' statements. By this, it is also possible to identify all patients with a blood culture sample carrying more than one species fully automatically. These queries

come with an increased complexity, which is why we decided to present the above-given simplified query instead.

## Supplementary Data 6: Retrieving Data from the OpenEHR-based Data Repository by openMibi

### Example:

#### Find all *Klebsiella pneumoniae* isolates resistant to Ciprofloxacin

Specific applications can be developed to interact with the data repository. An example is our self-developed tool called openMibi. We included a simple query builder to illustrate the capabilities of such tools for retrieving data as specified by a user through such application.

#### Step 0: Check availability of data in openEHR based format and access rights and credentials for openMibi

Data must be integrated into and available from an openEHR based data repository (e. g. *Better Platform* by Better d.o.o. in Ljubljana, SL<sup>8</sup> or *Ehrbase* (open source), commercial support by Vitasystems in Mannheim, DE<sup>9</sup>) at each institution, according to the consented and standardized data models. The user who would like to access data needs to gain access rights, credentials and connection parameters (e.g. the link to the openMibi tool).

#### Step 1: Open tool

OpenMibi is a web-based tool that can be accessed via a specific link when installed at the participating institution.

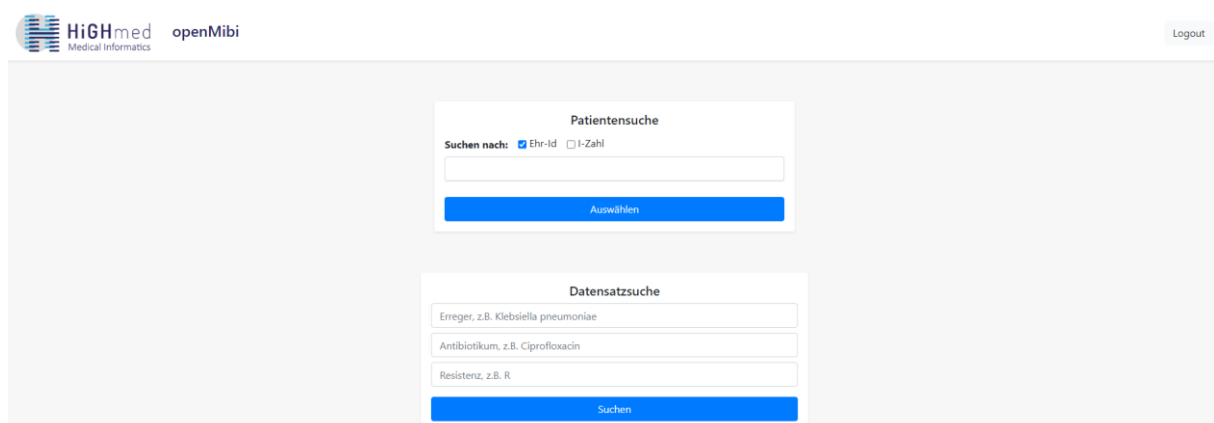

The screenshot displays the openMibi web interface. At the top left, there is a logo for 'HiGHmed Medical Informatics' and the text 'openMibi'. At the top right, there is a 'Logout' button. The main content area contains two search forms. The first form, titled 'Patientensuche', has a search criteria section with 'Suchen nach:' followed by radio buttons for 'Ehr-Id' (selected) and 'I-Zahl'. Below this is a text input field and a blue 'Auswählen' button. The second form, titled 'Datensatzsuche', has three text input fields: 'Erreger, z.B. Klebsiella pneumoniae', 'Antibiotikum, z.B. Ciprofloxacin', and 'Resistenz, z.B. R'. Below these fields is a blue 'Suchen' button.

Figure 3: OpenMibi

<sup>8</sup> <https://platform.better.care/>

<sup>9</sup> <https://ehrbase.org/>

### Step 2: Configure parameters

The user can either retrieve all microbiology reports by searching for a specific patient (as explained in Supplementary Information xx) or by using the newly added exemplary query builder. The user can define the desired microorganisms of interest, the antibiotic name and the resistance.

### Step 3: Creating query

In the background, the application now creates a query based on the archetype query language (AQL) and sends it to the repository.

### Step 4: Visualisation of results

The openMibi tool now is able of visualising all microbiology reports by their unique identifiers according to this request.

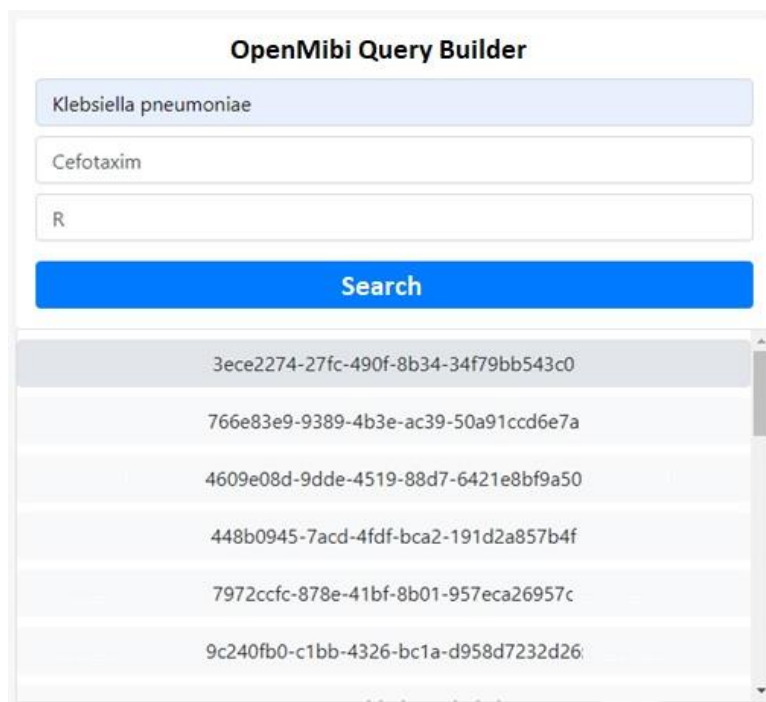

The screenshot displays the 'OpenMibi Query Builder' interface. It features three input fields: the first contains 'Klebsiella pneumoniae', the second contains 'Cefotaxim', and the third contains 'R'. Below these fields is a prominent blue 'Search' button. Underneath the button is a scrollable list of six unique identifiers (UUIDs) for microbiology reports. The first identifier is highlighted in grey.

| Report Identifier                    |
|--------------------------------------|
| 3ece2274-27fc-490f-8b34-34f79bb543c0 |
| 766e83e9-9389-4b3e-ac39-50a91ccd6e7a |
| 4609e08d-9dde-4519-88d7-6421e8bf9a50 |
| 448b0945-7acd-4fdf-bca2-191d2a857b4f |
| 7972ccfc-878e-41bf-8b01-957eca26957c |
| 9c240fb0-c1bb-4326-bc1a-d958d7232d26 |

Figure 4: OpenMibi Query Builder with first results

### Step 5: Browsing through reports

By clicking on a specific report identifier, the full report will be visualised as presented in Supplementary Data 3 and can be browsed.

## Microbiology report

Case identifier: 123456  
 Report state: Final  
 Date/time: 16/03/2017  
 Order identifier: 111222  
 Recipient location: Z3  
 Order request: aerobic/anaerobe culture

Case identifier: 123456  
 Report state: Final  
 Date/time: 13/03/2017  
 Order identifier: 222333  
 Recipient location: Z8  
 Order request: aerobic/anaerobe culture

Case identifier: 123456  
 Report state: Final  
 Date/time: 07/03/2017  
 Order identifier: 333444  
 Recipient location: Z7  
 Order request: MRSA

### Specimens

Specimen type: Blood culture aerobic  
 Specimen identifier: 999999999999  
 Date/time collected: 11/03/2017, 9:45 pm  
 Date/time received: 12/03/2017, 1:54 pm  
 Anatomical location: Other  
 MLAB name: Blood culture

Specimen type: Blood culture aerobic  
 Specimen identifier: 888888888888  
 Date/time collected: 11/03/2017, 9:45 pm  
 Date/time received: 12/03/2017, 1:54 pm  
 Anatomical location: Other  
 MLAB name: Blood culture

### Microorganisms

Name: *Klebsiella pneumoniae*  
 Result: Evidence  
 Date/time of result: 14/03/2017  
 Germ number: 1

Name: *Klebsiella pneumoniae*  
 Result: Evidence  
 Date/time of result: 14/03/2017  
 Germ number: 2

### Antibiogram

Date/time generated: 15/03/2017

| Antibiotic name                             | Resistance | MIC  | MLAB name               |
|---------------------------------------------|------------|------|-------------------------|
| Ampicillin                                  | R          | >32  | Ampicillin              |
| Ampicillin/Sulbactam                        | R          | >32  | Ampicillin-Sulbactam    |
| Aztreonam                                   | R          | >16  | Aztreonam               |
| Cefotaxim                                   | R          | >8   | Cefotaxim               |
| Ceftazidim                                  | R          | >32  | Ceftazidim              |
| Cefuroxim                                   | R          | >16  | Cefuroxim               |
| Ciprofloxacin                               | R          | >4   | Ciprofloxacin           |
| Colistin                                    | R          | =4   | Colistin                |
| Ertapenem                                   | R          | >4   | Ertapenem               |
| Gentamicin                                  | R          | >8   | Gentamicin              |
| Meropenem                                   | R          | >16  | Meropenem               |
| Moxifloxacin                                | R          | >2   | Moxifloxacin            |
| Piperacillin/Tazobactam                     | R          | >32  | Piperacillin-Tazobactam |
| Sulfamethoxazol/Trimethoprim (Cotrimoxazol) | R          | >16  | Cotrimoxazol            |
| Tetracyclin                                 | R          | =8   | Tetracyclin             |
| Tigecyclin                                  | S          | =0.5 | Tigecyclin              |
| Tobramycin                                  | R          | >8   | Tobramycin              |

Figure 5: OpenMibi – visualisation of microbiology report

## Supplementary Data 7: Retrieving Data from the OpenEHR-based Data Repository by openCQA

### Example:

#### MIC distribution of Ciprofloxacin and Cefotaxim in *Klebsiella pneumoniae* isolates from patients in 01/2017- 06/2017

Another example on how users can interact with the standardized data repository through an application can be visualized with our self-developed openCQA tool<sup>10</sup>. Here, the user needs to specify a query that delivers all potential relevant data sets. After that, the user can apply different statistical calculations that are automatically proposed by the tool. In the end, a specific analysis, such as the distribution of MIC for specific antibiotics and microorganisms (e.g. *MIC distribution of Ciprofloxacin and Cefotaxim in Klebsiella pneumoniae isolates from patients in 01/2017-06/2017*) are visualized.

#### Step 0: Check availability of data in openEHR based format and access rights and credentials for openCQA

Data must be integrated into and available from an openEHR based data repository (e. g. *Better Platform* by Better d.o.o. in Ljubljana<sup>11</sup>, SL or *Ehrbase* (open source), commercial support by Vitasystems in Mannheim, DE<sup>12</sup>) at each institution, according to the consented and standardized data models. The user who would like to access data needs to gain access rights, credentials and connection parameters (e.g. the link to the openCQA tool).

#### Step 1: Open tool

OpenCQA is a web-based tool that can be accessed via a specific link when installed at the participating institution.

---

<sup>10</sup> <https://pubmed.ncbi.nlm.nih.gov/33750371/>

<sup>11</sup> <https://platform.better.care/>

<sup>12</sup> <https://ehrbase.org/>

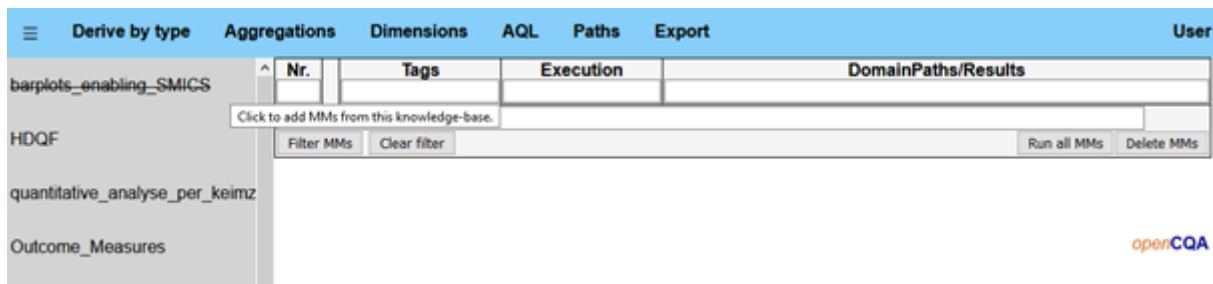

Figure 6: OpenCQA

### Step 2: Create query

By clicking on 'AQL', the user can define an AQL query to load data into the tool.

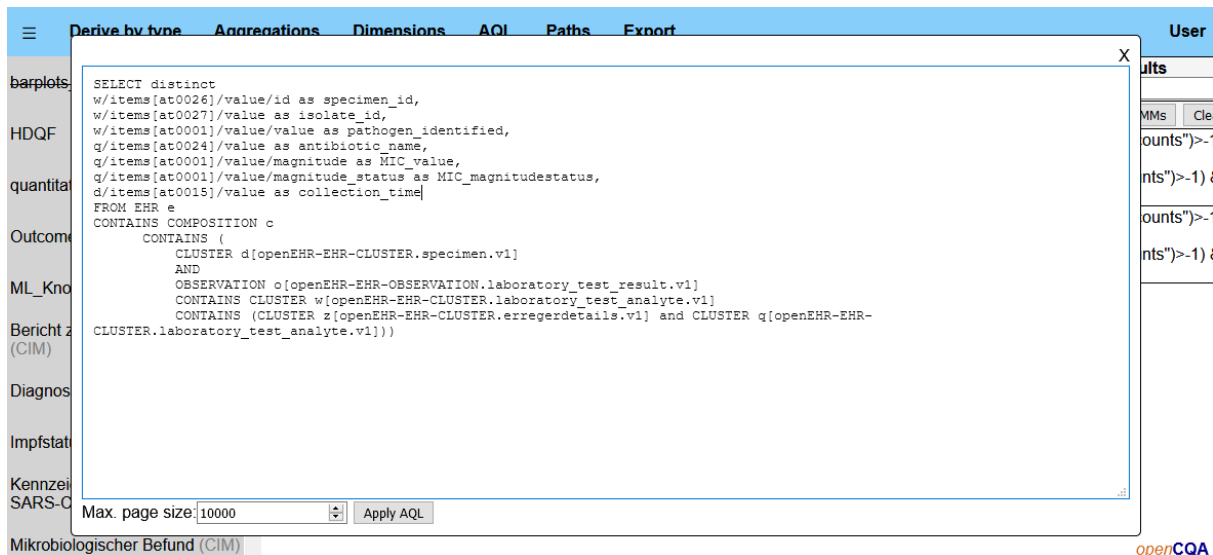

Figure 7: OpenCQA - AQL builder

### Step 3: Choose pre-defined methods

By clicking on 'derive by type', a set of pre-defined statistical methods are loaded and can be chosen (e.g. count, min, max, median).

### Step 4: Edit pre-defined methods

By clicking on 'edit', the pre-defined methods can be edited and customized. For instance, in 'group', a grouping rule can be specified to reach a 'count per group' as needed in our example. Furthermore, the 'characterization' input field can be filled with any R code to define new functions or methods. In our case, we wrote a new method to visualise the results as a customized bar plot.



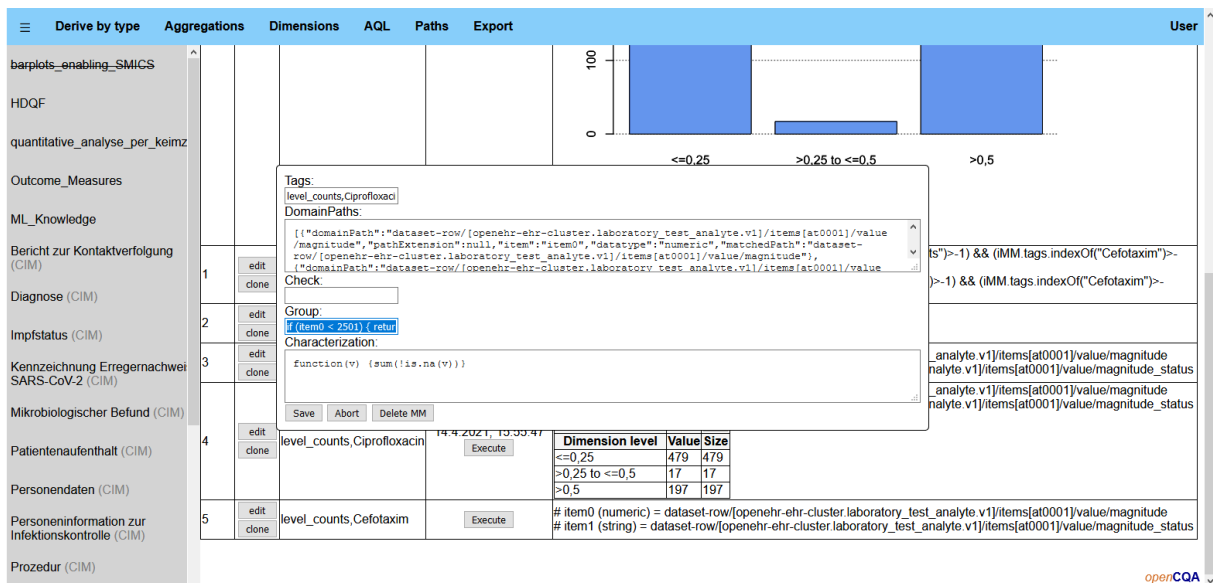

Figure 8: OpenCQA – Edit pre-defined methods

### Alternative step for 2-4

For reoccurring statistical tasks or calculations, all of the above-mentioned procedures can be stored in a so-called 'knowledge base'. They are directly loaded when starting openCQA.

### Step 5: Visualisation of results

By clicking on 'execute', the results for the chosen or edited methods are visualized.

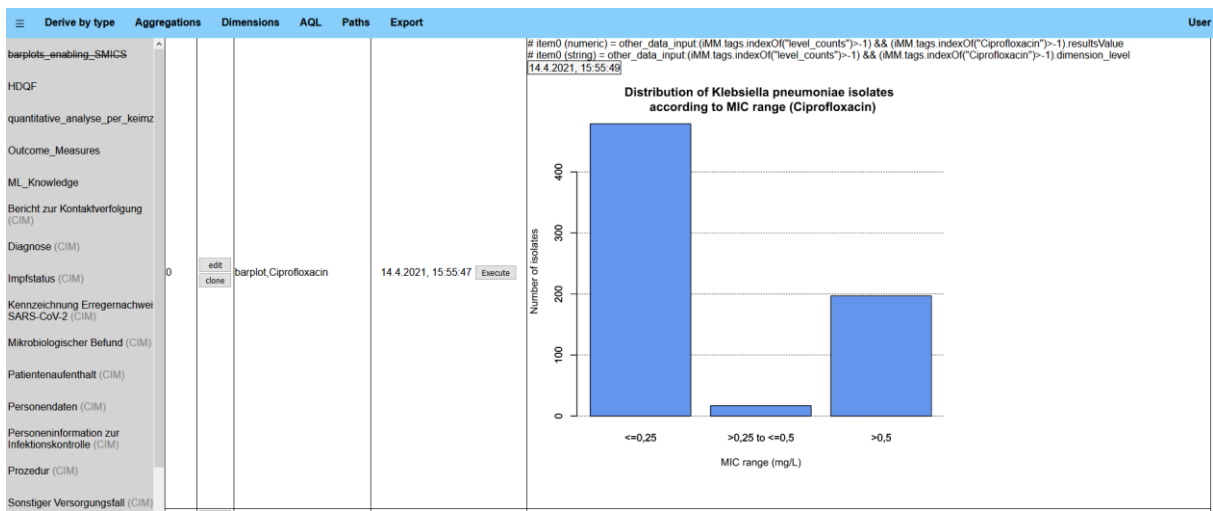

Figure 9: OpenCQA – Results (1)

| Derive by type                      | Aggregations | Dimensions    | AQL                        | Paths               | Export  | User                                                                                                                                                                                                                                                                                                                                     |                 |       |      |        |     |     |                |    |    |      |     |     |
|-------------------------------------|--------------|---------------|----------------------------|---------------------|---------|------------------------------------------------------------------------------------------------------------------------------------------------------------------------------------------------------------------------------------------------------------------------------------------------------------------------------------------|-----------------|-------|------|--------|-----|-----|----------------|----|----|------|-----|-----|
| barplots_enabling_SMICS             | 1            | edit<br>clone | barplot,Cefotaxim          |                     | Execute | # item0 (numeric) = other_data_input (MM tags.indexOf("level_counts")>-1) && (MM tags.indexOf("Cefotaxim")>-1) resultsValue<br># item0 (string) = other_data_input (MM tags.indexOf("level_counts")>-1) && (MM tags.indexOf("Cefotaxim")>-1) dimension_level                                                                             |                 |       |      |        |     |     |                |    |    |      |     |     |
| HDOF                                | 2            | edit<br>clone | row_count                  |                     | Execute | # item0 (string) = dataset-row/                                                                                                                                                                                                                                                                                                          |                 |       |      |        |     |     |                |    |    |      |     |     |
| quantitative_analyse_per_keimz      | 3            | edit<br>clone | level_counts,MIC           |                     | Execute | # item0 (numeric) = dataset-row[openehr-ehr-cluster laboratory_test_analyte v1]/items[at0001]value/magnitude<br># item1 (string) = dataset-row[openehr-ehr-cluster laboratory_test_analyte v1]/items[at0011]value/magnitude_status                                                                                                       |                 |       |      |        |     |     |                |    |    |      |     |     |
| Outcome_Measures                    |              |               |                            |                     |         | # item0 (numeric) = dataset-row[openehr-ehr-cluster laboratory_test_analyte v1]/items[at0001]value/magnitude<br># item1 (string) = dataset-row[openehr-ehr-cluster laboratory_test_analyte v1]/items[at0011]value/magnitude_status                                                                                                       |                 |       |      |        |     |     |                |    |    |      |     |     |
| ML_Knowledge                        | 4            | edit<br>clone | level_counts,Ciprofloxacin | 14.4.2021, 15:55:47 | Execute | 14.4.2021, 15:55:48 3 =<br><table border="1"> <thead> <tr> <th>Dimension level</th> <th>Value</th> <th>Size</th> </tr> </thead> <tbody> <tr> <td>&lt;=0,25</td> <td>479</td> <td>479</td> </tr> <tr> <td>&gt;0,25 to &lt;=0,5</td> <td>17</td> <td>17</td> </tr> <tr> <td>&gt;0,5</td> <td>197</td> <td>197</td> </tr> </tbody> </table> | Dimension level | Value | Size | <=0,25 | 479 | 479 | >0,25 to <=0,5 | 17 | 17 | >0,5 | 197 | 197 |
| Dimension level                     | Value        | Size          |                            |                     |         |                                                                                                                                                                                                                                                                                                                                          |                 |       |      |        |     |     |                |    |    |      |     |     |
| <=0,25                              | 479          | 479           |                            |                     |         |                                                                                                                                                                                                                                                                                                                                          |                 |       |      |        |     |     |                |    |    |      |     |     |
| >0,25 to <=0,5                      | 17           | 17            |                            |                     |         |                                                                                                                                                                                                                                                                                                                                          |                 |       |      |        |     |     |                |    |    |      |     |     |
| >0,5                                | 197          | 197           |                            |                     |         |                                                                                                                                                                                                                                                                                                                                          |                 |       |      |        |     |     |                |    |    |      |     |     |
| Bericht zur Kontaktverfolgung (CIM) |              |               |                            |                     |         |                                                                                                                                                                                                                                                                                                                                          |                 |       |      |        |     |     |                |    |    |      |     |     |
| Diagnose (CIM)                      | 5            | edit<br>clone | level_counts,Cefotaxim     |                     | Execute | # item0 (numeric) = dataset-row[openehr-ehr-cluster laboratory_test_analyte v1]/items[at0001]value/magnitude<br># item1 (string) = dataset-row[openehr-ehr-cluster laboratory_test_analyte v1]/items[at0011]value/magnitude_status                                                                                                       |                 |       |      |        |     |     |                |    |    |      |     |     |

Figure 10: OpenCQA – Results (2)

The results for our example look like this:

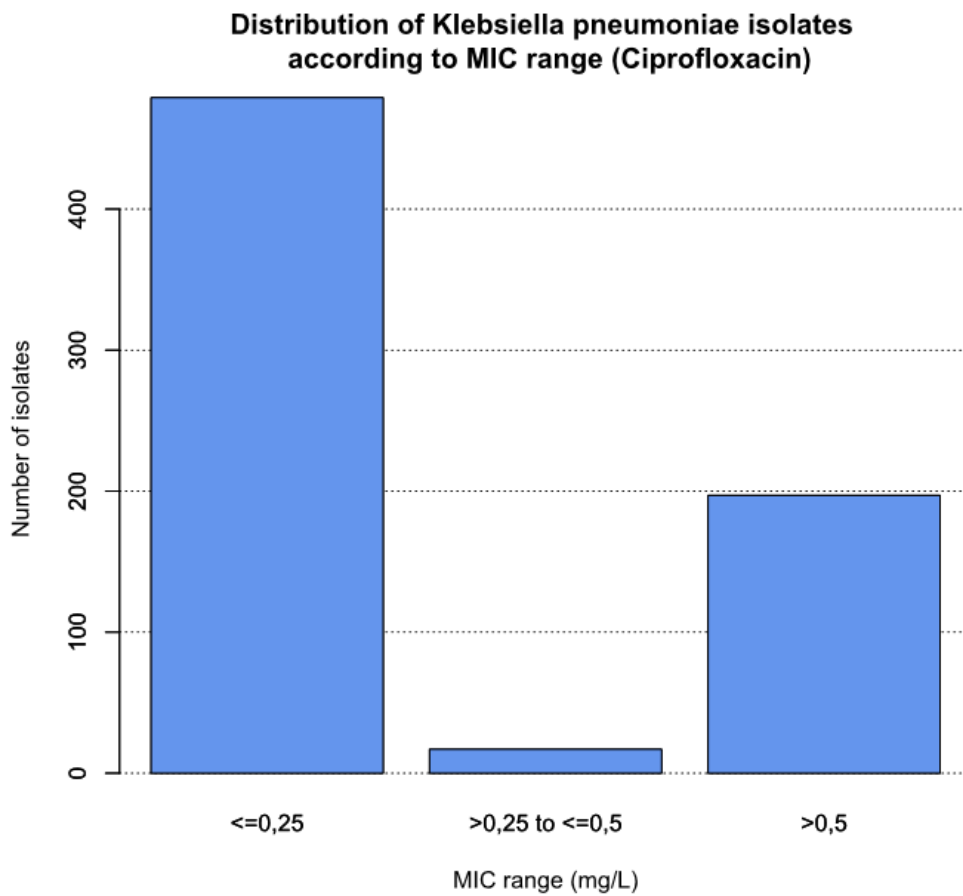

Figure 11: Distribution of *Klebsiella pneumoniae* isolates according to MIC range (Ciprofloxacin)

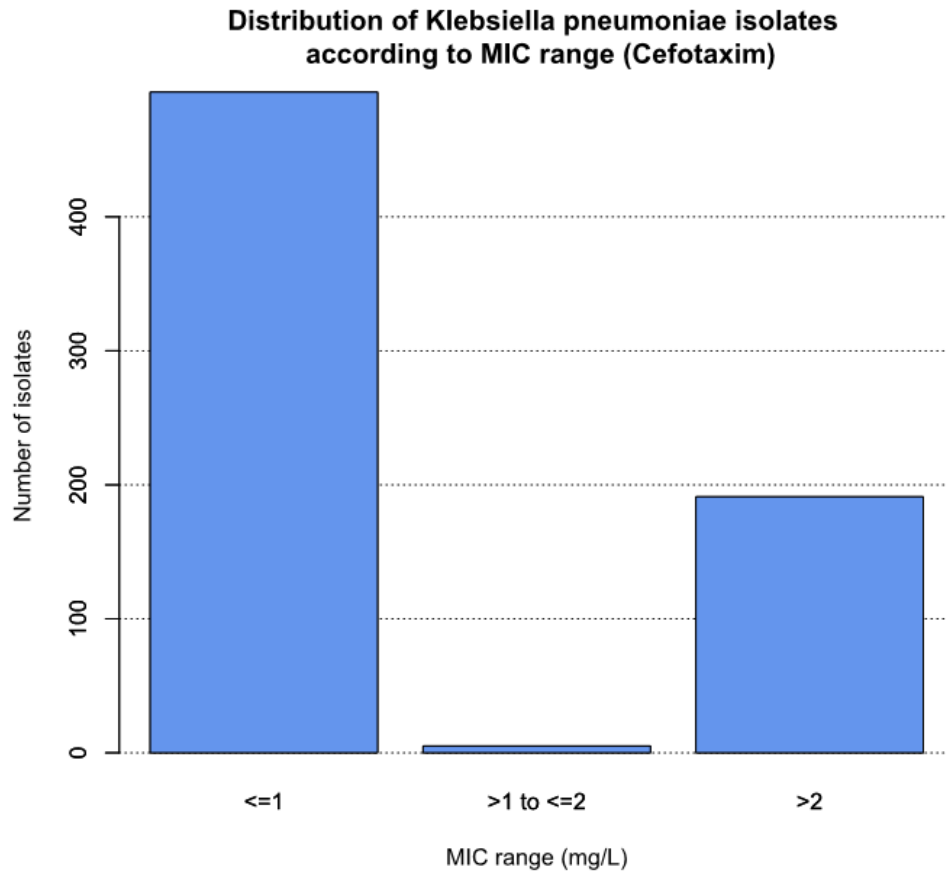

Figure 12: Distribution of *Klebsiella pneumoniae* isolates according to MIC range (Cefotaxim)

**Supplementary Data 8: Results of the data quality check with pre-defined tasks and an extract of three exemplary result sets with different complexity levels of the openCQA tool**

| Task                                                                                                                                                                               | openCQA Result                                                                                                                                                                                                                                                                                                                                                                                                                                                                                                                                                                                                                                                                                                                                                                                                                                                      |           |       |          |       |                      |         |           |        |         |     |          |        |              |        |
|------------------------------------------------------------------------------------------------------------------------------------------------------------------------------------|---------------------------------------------------------------------------------------------------------------------------------------------------------------------------------------------------------------------------------------------------------------------------------------------------------------------------------------------------------------------------------------------------------------------------------------------------------------------------------------------------------------------------------------------------------------------------------------------------------------------------------------------------------------------------------------------------------------------------------------------------------------------------------------------------------------------------------------------------------------------|-----------|-------|----------|-------|----------------------|---------|-----------|--------|---------|-----|----------|--------|--------------|--------|
| <b>General information</b>                                                                                                                                                         | <table border="1" style="margin-left: auto; margin-right: auto;"> <thead> <tr> <th data-bbox="679 488 928 546">Dimension</th> <th data-bbox="928 488 1193 546">Count</th> </tr> </thead> <tbody> <tr> <td data-bbox="679 546 928 613">Patients</td> <td data-bbox="928 546 1193 613">51947</td> </tr> <tr> <td data-bbox="679 613 928 725">Microbiology reports</td> <td data-bbox="928 613 1193 725">260.084</td> </tr> <tr> <td data-bbox="679 725 928 784">Specimens</td> <td data-bbox="928 725 1193 784">303344</td> </tr> <tr> <td data-bbox="679 784 928 842">Species</td> <td data-bbox="928 784 1193 842">754</td> </tr> <tr> <td data-bbox="679 842 928 900">Isolates</td> <td data-bbox="928 842 1193 900">240594</td> </tr> <tr> <td data-bbox="679 900 928 967">Antibiograms</td> <td data-bbox="928 900 1193 967">103742</td> </tr> </tbody> </table> | Dimension | Count | Patients | 51947 | Microbiology reports | 260.084 | Specimens | 303344 | Species | 754 | Isolates | 240594 | Antibiograms | 103742 |
|                                                                                                                                                                                    | Dimension                                                                                                                                                                                                                                                                                                                                                                                                                                                                                                                                                                                                                                                                                                                                                                                                                                                           | Count     |       |          |       |                      |         |           |        |         |     |          |        |              |        |
|                                                                                                                                                                                    | Patients                                                                                                                                                                                                                                                                                                                                                                                                                                                                                                                                                                                                                                                                                                                                                                                                                                                            | 51947     |       |          |       |                      |         |           |        |         |     |          |        |              |        |
|                                                                                                                                                                                    | Microbiology reports                                                                                                                                                                                                                                                                                                                                                                                                                                                                                                                                                                                                                                                                                                                                                                                                                                                | 260.084   |       |          |       |                      |         |           |        |         |     |          |        |              |        |
|                                                                                                                                                                                    | Specimens                                                                                                                                                                                                                                                                                                                                                                                                                                                                                                                                                                                                                                                                                                                                                                                                                                                           | 303344    |       |          |       |                      |         |           |        |         |     |          |        |              |        |
|                                                                                                                                                                                    | Species                                                                                                                                                                                                                                                                                                                                                                                                                                                                                                                                                                                                                                                                                                                                                                                                                                                             | 754       |       |          |       |                      |         |           |        |         |     |          |        |              |        |
|                                                                                                                                                                                    | Isolates                                                                                                                                                                                                                                                                                                                                                                                                                                                                                                                                                                                                                                                                                                                                                                                                                                                            | 240594    |       |          |       |                      |         |           |        |         |     |          |        |              |        |
| Antibiograms                                                                                                                                                                       | 103742                                                                                                                                                                                                                                                                                                                                                                                                                                                                                                                                                                                                                                                                                                                                                                                                                                                              |           |       |          |       |                      |         |           |        |         |     |          |        |              |        |
| <p><u>Distribution of microbiology reports per patient (see Supplementary Data 9 for a box plot)</u></p>                                                                           |                                                                                                                                                                                                                                                                                                                                                                                                                                                                                                                                                                                                                                                                                                                                                                                                                                                                     |           |       |          |       |                      |         |           |        |         |     |          |        |              |        |
| <table border="1" style="margin-left: auto; margin-right: auto;"> <tr> <td data-bbox="485 1093 884 1151">Mean</td> <td data-bbox="884 1093 1273 1151">5.006718</td> </tr> </table> | Mean                                                                                                                                                                                                                                                                                                                                                                                                                                                                                                                                                                                                                                                                                                                                                                                                                                                                | 5.006718  |       |          |       |                      |         |           |        |         |     |          |        |              |        |
| Mean                                                                                                                                                                               | 5.006718                                                                                                                                                                                                                                                                                                                                                                                                                                                                                                                                                                                                                                                                                                                                                                                                                                                            |           |       |          |       |                      |         |           |        |         |     |          |        |              |        |
| <table border="1" style="margin-left: auto; margin-right: auto;"> <tr> <td data-bbox="485 1160 884 1218">Median</td> <td data-bbox="884 1160 1273 1218">2</td> </tr> </table>      | Median                                                                                                                                                                                                                                                                                                                                                                                                                                                                                                                                                                                                                                                                                                                                                                                                                                                              | 2         |       |          |       |                      |         |           |        |         |     |          |        |              |        |
| Median                                                                                                                                                                             | 2                                                                                                                                                                                                                                                                                                                                                                                                                                                                                                                                                                                                                                                                                                                                                                                                                                                                   |           |       |          |       |                      |         |           |        |         |     |          |        |              |        |
| <table border="1" style="margin-left: auto; margin-right: auto;"> <tr> <td data-bbox="485 1227 884 1285">Maximum</td> <td data-bbox="884 1227 1273 1285">350</td> </tr> </table>   | Maximum                                                                                                                                                                                                                                                                                                                                                                                                                                                                                                                                                                                                                                                                                                                                                                                                                                                             | 350       |       |          |       |                      |         |           |        |         |     |          |        |              |        |
| Maximum                                                                                                                                                                            | 350                                                                                                                                                                                                                                                                                                                                                                                                                                                                                                                                                                                                                                                                                                                                                                                                                                                                 |           |       |          |       |                      |         |           |        |         |     |          |        |              |        |
| <b>Proportion of MRSA</b>                                                                                                                                                          | <p><u>Percentage of MRSA on all <i>Staphylococcus aureus</i> isolates</u><br/>           Number of <i>Staphylococcus aureus</i> isolates: 7916<br/>           Number of <i>Methicillin-resistant Staphylococcus aureus</i> isolates: 1724<br/> <math>= 1724/7916 = 0.218 = \mathbf{21.8\%}</math> (including copy strains)</p>                                                                                                                                                                                                                                                                                                                                                                                                                                                                                                                                      |           |       |          |       |                      |         |           |        |         |     |          |        |              |        |
| <b>Proportion of Meropenem-resistant <i>Klebsiella pneumoniae</i></b>                                                                                                              | <p>Number of <i>Klebsiella pneumoniae</i> isolates: 3367<br/>           Number of <i>Meropenem-resistant Klebsiella pneumoniae</i> isolates: 164<br/> <math>= 164/3367 = 0.049 = \mathbf{4.9\%}</math> (including copy strains)</p>                                                                                                                                                                                                                                                                                                                                                                                                                                                                                                                                                                                                                                 |           |       |          |       |                      |         |           |        |         |     |          |        |              |        |

|                                                                |                                                                                                                                                                |                           |
|----------------------------------------------------------------|----------------------------------------------------------------------------------------------------------------------------------------------------------------|---------------------------|
| <b>Quantitative analysis</b>                                   | Distribution of bacterial counts in positive urine samples with <i>Escherichia coli</i> as the sole microorganism (see Supplementary Data 10 for the diagram): |                           |
|                                                                | <b>Bacterial count</b>                                                                                                                                         | <b>Frequency</b>          |
|                                                                | not specified                                                                                                                                                  | 242                       |
|                                                                | 10 <sup>2</sup> /ml                                                                                                                                            | 258                       |
|                                                                | 10 <sup>3</sup> /ml                                                                                                                                            | 477                       |
|                                                                | 10 <sup>4</sup> /ml                                                                                                                                            | 985                       |
|                                                                | 10 <sup>5</sup> /ml                                                                                                                                            | 3,638                     |
| <b>Top 10 of isolates found per species (with antibiogram)</b> | <b>Species</b>                                                                                                                                                 | <b>Number of isolates</b> |
|                                                                | <i>Escherichia coli</i>                                                                                                                                        | 11246                     |
|                                                                | <i>Staphylococcus aureus</i>                                                                                                                                   | 7916                      |
|                                                                | <i>Pseudomonas aeruginosa</i>                                                                                                                                  | 7775                      |
|                                                                | <i>Enterococcus faecium</i>                                                                                                                                    | 4818                      |
|                                                                | <i>Enterococcus faecalis</i>                                                                                                                                   | 4483                      |
|                                                                | <i>Klebsiella pneumoniae</i>                                                                                                                                   | 3367                      |
|                                                                | <i>Staphylococcus epidermidis</i>                                                                                                                              | 3274                      |
|                                                                | <i>Enterobacter cloacae</i>                                                                                                                                    | 2143                      |
|                                                                | <i>Klebsiella oxytoca</i>                                                                                                                                      | 1740                      |
| <i>Proteus mirabilis</i>                                       | 1677                                                                                                                                                           |                           |

Table 5: Results of the data quality check with pre-defined tasks and an extract of three exemplary result sets with different complexity levels of the openCQA tool

**Supplementary Data 9: Automated data quality check: openCQA result (Distribution of microbiology reports)**

**Distribution of microbiology reports per patient**

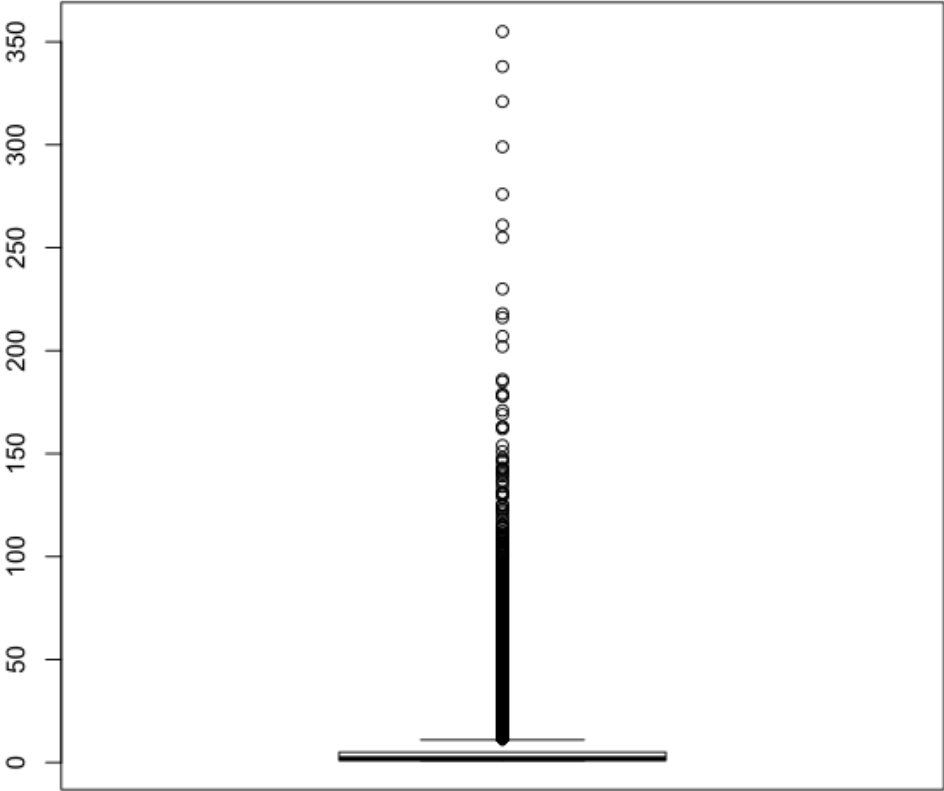

Figure 13: Distribution of microbiology reports per patient

**Supplementary Data 10: Automated data quality check: openCQA result (Distribution of bacterial counts)**

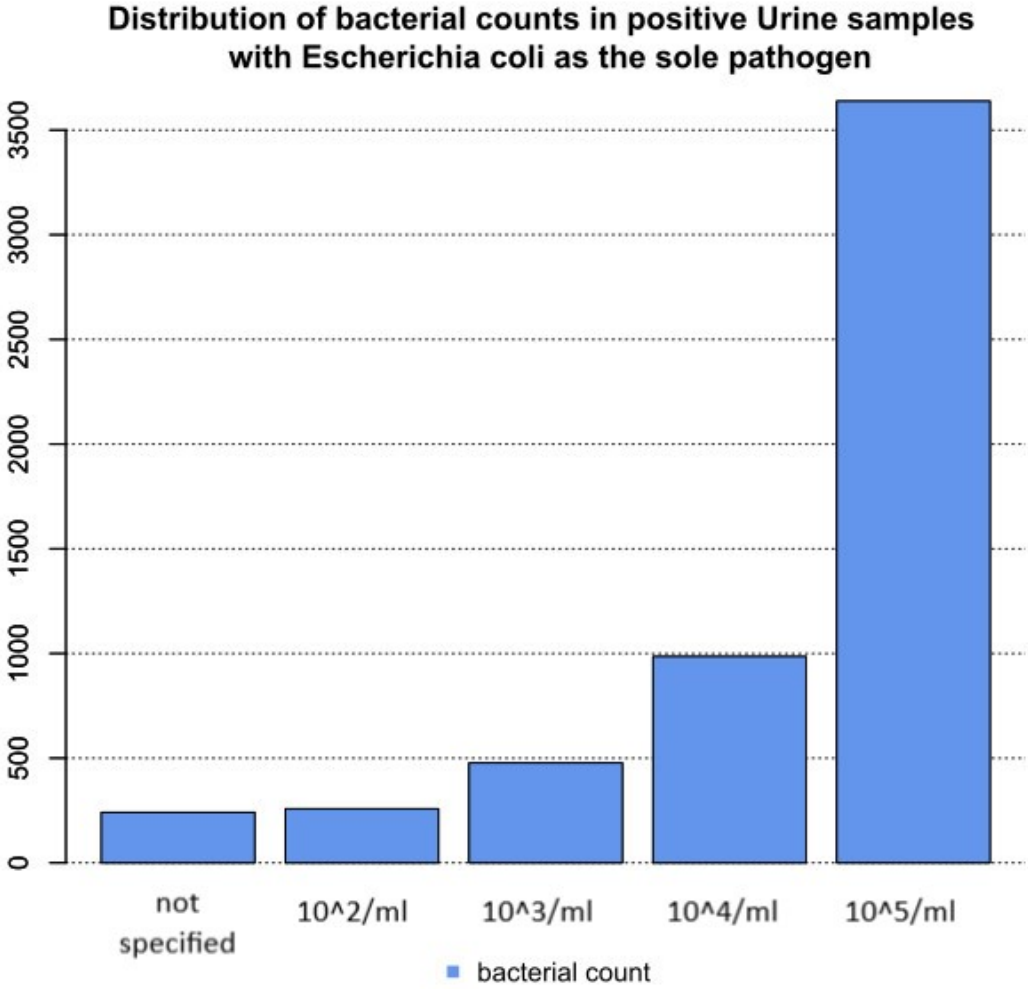

Figure 14: OpenCQA result on distribution of bacterial counts in positive Urine samples with Escherichia coli as the sole bacteria
